# Supplementary material for: New Quinoid Bio-Inspired Materials Using Para-Azaquinodimethane Moiety
Source: MDPI journal article supplement (doi:10.3390/molecules29010186), 2023-12-28
Supplement: s1 [file s1]

## Supporting Information

|                                                                                |           |
|--------------------------------------------------------------------------------|-----------|
| <b>1. Optical properties.....</b>                                              | <b>2</b>  |
| <i>1a) Comparison of UV spectra in different solvents.....</i>                 | <i>2</i>  |
| <i>1b) Absorption spectra of non-quinoidal vs quinoidal intermediates.....</i> | <i>3</i>  |
| <i>1c) Calculation of molar extinction coefficients.....</i>                   | <i>3</i>  |
| <b>2. Thermal properties.....</b>                                              | <b>5</b>  |
| <b>3. Theoretical calculations.....</b>                                        | <b>6</b>  |
| <b>4. NMR spectra.....</b>                                                     | <b>14</b> |
| <b>5. References.....</b>                                                      | <b>20</b> |

## 1. Optical properties

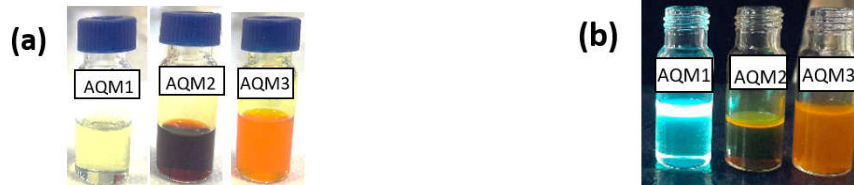

**Figure S1:** Photos showing the colors of p-AQM molecules in chloroform solutions (a) and under UV light of 254 nm (b).

### 1a) Comparison of UV spectra in different solvents

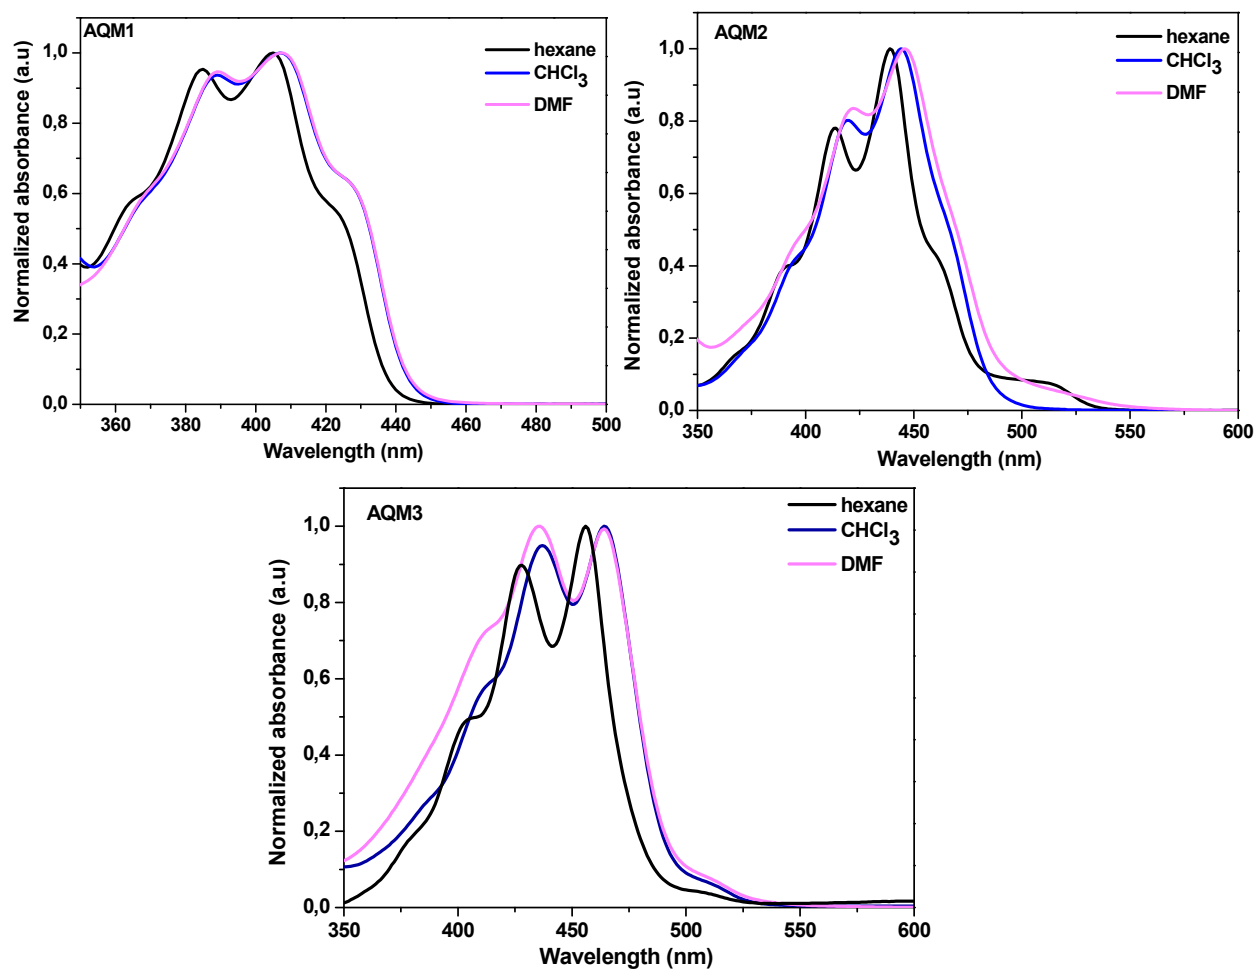

**Figure S2:** Normalized UV/visible absorption spectra of AQM1, AQM2 and AQM3 in different solvents

**Table S1:** Maximum absorption wavelengths of **AQM 1-3** in different solvents

|                 | $\lambda_{\text{max}}[\text{nm}]$<br>(AQM 1) | $\lambda_{\text{max}}[\text{nm}]$<br>(AQM 2) | $\lambda_{\text{max}}[\text{nm}]$<br>(AQM 3) |
|-----------------|----------------------------------------------|----------------------------------------------|----------------------------------------------|
| Hexane          | 405                                          | 440                                          | 456                                          |
| $\text{CHCl}_3$ | 407                                          | 444                                          | 465                                          |
| DMF             | 407                                          | 446                                          | 465                                          |

*1b) Absorption spectra of non-quinoidal vs quinoidal molecules*

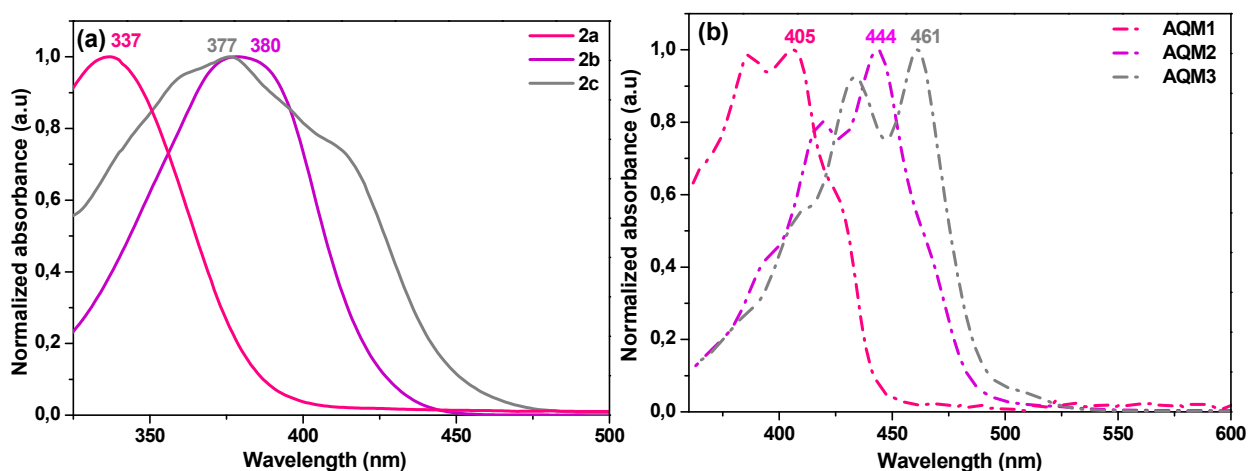

**Figure S3:** Comparison of normalized UV/visible absorption spectra of (a) non-quinoidal intermediates **2a-c**, and (b) p-AQM molecules in  $10^{-5}$  M THF solution .

*1c) Calculation of molar extinction coefficients*

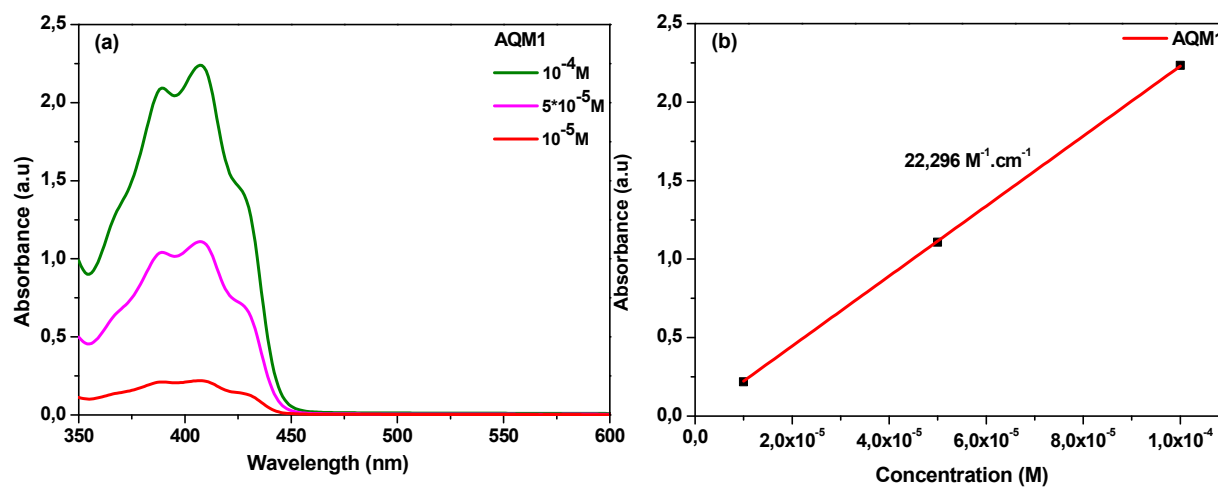

**Figure S4:** (a) UV/visible absorption spectra of **AQM1** at different concentrations in  $\text{CHCl}_3$   
(b) Absorbance vs Concentration plot of **AQM1** in  $\text{CHCl}_3$

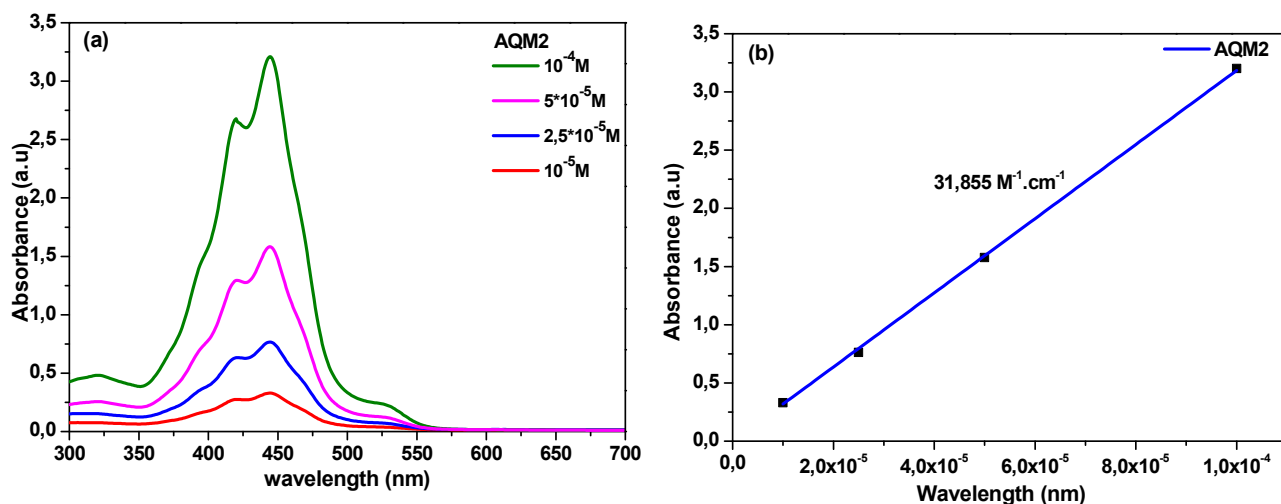

**Figure S5:** (a) UV/visible absorption spectra of AQM2 at different concentrations in  $\text{CHCl}_3$   
 (b) Absorbance vs Concentration plot of AQM2 in  $\text{CHCl}_3$

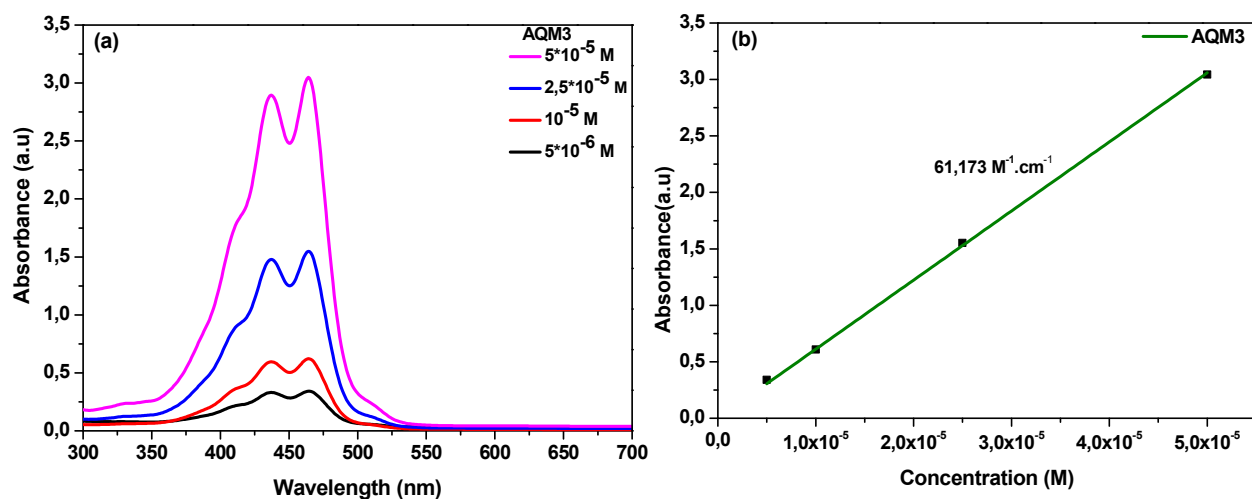

**Figure S6:** (a) UV/visible absorption spectra of AQM3 at different concentrations in  $\text{CHCl}_3$   
 (b) Absorbance vs Concentration plot of AQM3 in  $\text{CHCl}_3$

## 2. Thermal properties

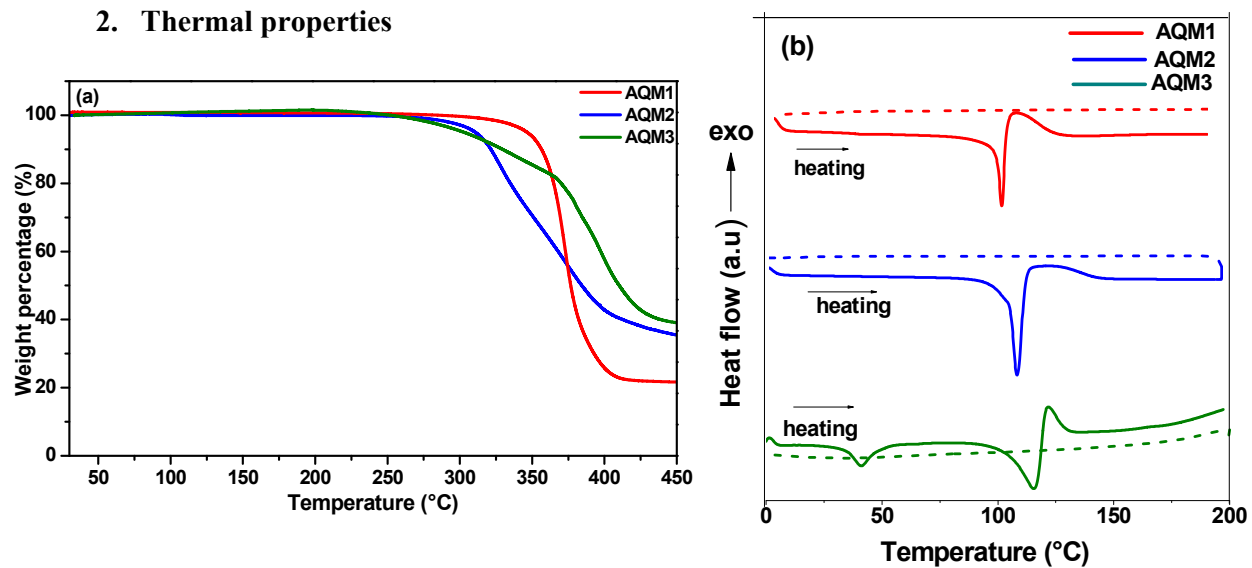

**Figure S7:** (a): TGA curves under nitrogen at 10 °C /min scan rate. (b): DSC curves under nitrogen: 1<sup>st</sup> heating (full line) and cooling cycles (dashed line) at 10 °C/min scan rate

**Table S2:** Thermal properties of p-AQM molecules

|             | T <sub>d</sub> (°C) | T <sub>m</sub> <sup>a</sup> (°C) | T <sub>m</sub> <sup>b</sup> (°C) |
|-------------|---------------------|----------------------------------|----------------------------------|
| <b>AQM1</b> | 340                 | 105                              | 109                              |
| <b>AQM2</b> | 312                 | 110                              | 103                              |
| <b>AQM3</b> | 292                 | 40, 115                          | 117                              |

<sup>a</sup>: Measured by DSC

<sup>b</sup>: Measured by capillary method

### 3. Theoretical calculations

**AQM1** and **AQM2** can exist as *Z* and *E* isomers depending on the configuration of the double bond connecting the azaquinodimethane unit with the substituents (see for example **Figure S8**). Only the symmetric isomers with the same *E* or *Z* conformations on the left and right sides of the molecule are considered for simplicity.

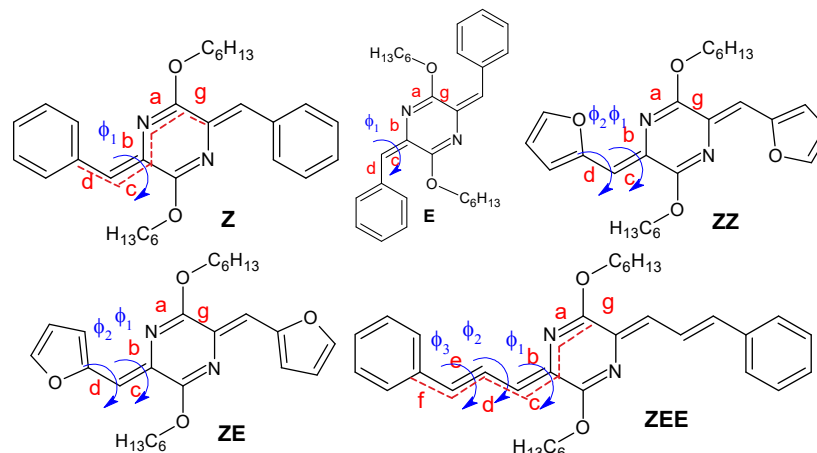

**Figure S8:** *E*, *Z*, *ZZ*, *ZE* and *ZEE* isomers displayed for **AQM1-3**

For **AQM3** due to the presence of several double bond between the phenyl groups and the central unit we calculated 8 isomers and concluded that the isomer labeled as *ZEE* is the most stable. Furthermore and considering the energies difference with the other isomer, i. e. more than 10 kJ/mol, the *ZEE* isomer is the only one that we consider to calculate the absorption spectra of this molecule. All the PBE0, B3LYP and  $\omega$ B97X-D XCF give the same energetic ordering of the different isomer: *Z* < *E* for **AQM1**, *ZE* < *ZZ* < *EE* < *EZ* for **AQM2** and *ZEE* < *EEE* < *ZEZ* < *ZZE* < *EEZ* < *ZZZ* < *EZE* < *EZZ* for **AQM3** (See **Table S3**)

**Table S3:** Relative energies (in kJ.mol<sup>-1</sup>) of the isomers of **AQM1**, **AQM2** and **AQM3** compounds calculated at the PBE0/6-311G(d,p) and B3LYP/6-311G(d,p) levels.

| <b>AQM1</b>    | <b>Z</b>   | <b>E</b>   |            |            |            |            |            |            |
|----------------|------------|------------|------------|------------|------------|------------|------------|------------|
| PBE0           | 0          | 54.9       |            |            |            |            |            |            |
| B3LYP          | 0          | 54.1       |            |            |            |            |            |            |
| $\omega$ B97XD | 0          | 40.8       |            |            |            |            |            |            |
| <b>AQM2</b>    | <b>ZE</b>  | <b>EE</b>  | <b>ZZ</b>  | <b>EZ</b>  |            |            |            |            |
| PBE0           | 0          | 50.1       | 14.9       | 60.3       |            |            |            |            |
| B3LYP          | 0          | 49.3       | 13.6       | 58.9       |            |            |            |            |
| $\omega$ B97XD | 0          | 50.0       | 21.1       | 57.8       |            |            |            |            |
| <b>AQM3</b>    | <b>EEE</b> | <b>EEZ</b> | <b>ZEE</b> | <b>ZEZ</b> | <b>EZE</b> | <b>ZZE</b> | <b>ZZZ</b> | <b>EZZ</b> |
| PBE0           | 23.8       | 56.9       | 0          | 29.8       | 86.5       | 30.1       | 79.3       | 117.9      |
| B3LYP          | 24.0       | 58.3       | 0          | 31.9       | 88.1       | 33.6       | 91.7       | 128.5      |
| $\omega$ B97XD | 21.3       | 47.0       | 0          | 19.1       | 50.9       | 18.2       | 27.3       | 48.9       |

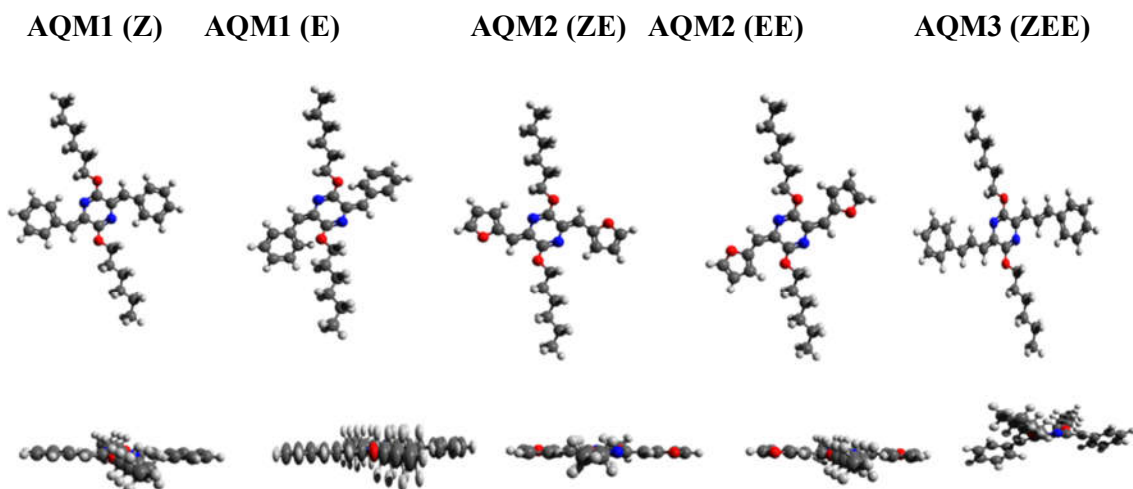

**Figure S9.** Optimized geometries of the isomers of AQM1, AQM2 and AQM3 (ZEE) compounds (PBE0/6-311G(d,p) calculations) (top view and side view).

**Table S4:** Geometric parameters of the isomers of AQM1, AQM2 and AQM3 compounds calculated at the PBE0/6-311G(d,p) and B3LYP/6-311G(d,p) levels.

|                                 | a     | B     | c     | D     | e | f | g     | $\phi 1$ | $\phi 2$ | $\phi 3$ | BLA   |
|---------------------------------|-------|-------|-------|-------|---|---|-------|----------|----------|----------|-------|
| <b>AQM1</b>                     |       |       |       |       |   |   |       |          |          |          |       |
| <b>PBE0</b>                     |       |       |       |       |   |   |       |          |          |          |       |
| Z                               | 1.285 | 1.382 | 1.361 | 1.450 |   |   | 1.466 | 0.0      |          |          | 0.110 |
| E                               | 1.282 | 1.391 | 1.357 | 1.458 |   |   | 1.469 | 173.4    |          |          | 0.120 |
| <b>B3LYP</b>                    |       |       |       |       |   |   |       |          |          |          |       |
| Z                               | 1.288 | 1.389 | 1.368 | 1.455 |   |   | 1.473 | 0.0      |          |          | 0.111 |
| E                               | 1.285 | 1.398 | 1.361 | 1.462 |   |   | 1.476 | 173.2    |          |          | 0.122 |
| <b><math>\omega</math>B97XD</b> |       |       |       |       |   |   |       |          |          |          |       |
| Z                               | 1.280 | 1.391 | 1.351 | 1.461 |   |   | 1.476 | 0.0      |          |          | 1.127 |
| E                               | 1.278 | 1.401 | 1.345 | 1.472 |   |   | 1.482 | 174.3    |          |          | 0.140 |
| <b>AQM2</b>                     |       |       |       |       |   |   |       |          |          |          |       |
| <b>PBE0</b>                     |       |       |       |       |   |   |       |          |          |          |       |
| ZE                              | 1.287 | 1.381 | 1.363 | 1.423 |   |   | 1.460 | 0        | 180.0    |          | 0.096 |
| EE                              | 1.284 | 1.386 | 1.367 | 1.458 |   |   | 1.458 | 180.0    | 180.0    |          | 0.108 |
| ZZ                              | 1.285 | 1.379 | 1.363 | 1.423 |   |   | 1.463 | 0.4      | 0.3      |          | 0.098 |
| EZ                              | 1.284 | 1.387 | 1.363 | 1.426 |   |   | 1.465 | 172.1    | 11.6     |          | 0.102 |
| <b>B3LYP</b>                    |       |       |       |       |   |   |       |          |          |          |       |
| ZE                              | 1.290 | 1.387 | 1.367 | 1.426 |   |   | 1.466 | 0.0      | 180.0    |          | 0.098 |
| EE                              | 1.287 | 1.393 | 1.372 | 1.428 |   |   | 1.463 | 178.9    | 179.0    |          | 0.098 |
| ZZ                              | 1.288 | 1.385 | 1.367 | 1.426 |   |   | 1.468 | 0.0      | 0.0      |          | 0.099 |
| EZ                              | 1.288 | 1.394 | 1.367 | 1.429 |   |   | 1.470 | 171.8    | 11.4     |          | 0.103 |
| <b><math>\omega</math>B97XD</b> |       |       |       |       |   |   |       |          |          |          |       |
| ZE                              | 1.281 | 1.389 | 1.352 | 1.435 |   |   | 1.470 | 0.0      | 180.0    |          | 0.115 |
| EE                              | 1.278 | 1.397 | 1.355 | 1.439 |   |   | 1.469 | 177.6    | 174.8    |          | 0.118 |
| ZZ                              | 1.279 | 1.388 | 1.352 | 1.435 |   |   | 1.473 | 0.0      | 0.0      |          | 0.116 |
| EZ                              | 1.279 | 1.398 | 1.348 | 1.444 |   |   | 1.479 | 172.1    | 26.3     |          | 0.127 |

| AQM3                            |       |       |       |       |       |       |       |       |       |       |       |
|---------------------------------|-------|-------|-------|-------|-------|-------|-------|-------|-------|-------|-------|
| <b>PBE0</b>                     |       |       |       |       |       |       |       |       |       |       |       |
| EEE                             | 1.285 | 1.383 | 1.370 | 1.425 | 1.355 | 1.453 | 1.461 | 180.0 | 180.0 | 180.0 | 0.094 |
| EEZ                             | 1.284 | 1.384 | 1.369 | 1.430 | 1.357 | 1.460 | 1.463 | 175.9 | 174.0 | 7.0   | 0.097 |
| ZEE                             | 1.286 | 1.380 | 1.366 | 1.426 | 1.353 | 1.454 | 1.461 | 0.0   | 180.0 | 180.0 | 0.095 |
| ZEZ                             | 1.286 | 1.388 | 1.366 | 1.430 | 1.355 | 1.461 | 1.463 | 2.8   | 175.7 | 6.2   | 0.100 |
| EZE                             | 1.284 | 1.386 | 1.368 | 1.437 | 1.350 | 1.456 | 1.464 | 173.5 | 26.0  | 177.0 | 0.102 |
| ZZE                             | 1.288 | 1.378 | 1.369 | 1.434 | 1.355 | 1.455 | 1.461 | 0.1   | 0.9   | 179.9 | 0.095 |
| ZZZ                             | 1.285 | 1.378 | 1.362 | 1.444 | 1.352 | 1.459 | 1.467 | 1.4   | 40.7  | 8.8   | 0.104 |
| EZZ                             | 1.283 | 1.388 | 1.359 | 1.449 | 1.347 | 1.463 | 1.468 | 176.6 | 46.2  | 2.4   | 0.112 |
| <b>B3LYP</b>                    |       |       |       |       |       |       |       |       |       |       |       |
| EEE                             | 1.288 | 1.390 | 1.374 | 1.428 | 1.359 | 1.457 | 1.466 | 180.0 | 180.0 | 180.0 | 0.095 |
| EEZ                             | 1.288 | 1.391 | 1.373 | 1.433 | 1.360 | 1.465 | 1.468 | 175.9 | 175.3 | 6.8   | 0.099 |
| ZEE                             | 1.290 | 1.387 | 1.371 | 1.429 | 1.356 | 1.458 | 1.466 | 0.0   | 180.0 | 180.0 | 0.096 |
| ZEZ                             | 1.289 | 1.387 | 1.370 | 1.433 | 1.358 | 1.465 | 1.468 | 2.8   | 176.3 | 6.0   | 0.099 |
| EZE                             | 1.287 | 1.393 | 1.373 | 1.441 | 1.354 | 1.460 | 1.469 | 172.8 | 23.6  | 176.4 | 0.103 |
| ZZE                             | 1.292 | 1.385 | 1.373 | 1.437 | 1.358 | 1.460 | 1.467 | 0.2   | 1.0   | 179.9 | 0.096 |
| ZZZ                             | 1.288 | 1.385 | 1.364 | 1.449 | 1.354 | 1.464 | 1.473 | 1.0   | 42.7  | 8.6   | 0.107 |
| EZZ                             | 1.286 | 1.396 | 1.362 | 1.454 | 1.350 | 1.467 | 1.473 | 178.1 | 49.2  | 2.7   | 0.115 |
| <b><math>\omega</math>B97XD</b> |       |       |       |       |       |       |       |       |       |       |       |
| EEE                             | 1.279 | 1.396 | 1.357 | 1.441 | 1.345 | 1.465 | 1.473 | 180.0 | 180.0 | 180.0 | 0.117 |
| EEZ                             | 1.278 | 1.396 | 1.355 | 1.446 | 1.346 | 1.472 | 1.473 | 176.7 | 170.8 | 5.7   | 0.120 |
| ZEE                             | 1.280 | 1.392 | 1.353 | 1.440 | 1.344 | 1.466 | 1.472 | 0.0   | 180.0 | 180.0 | 0.117 |
| ZEZ                             | 1.280 | 1.392 | 1.352 | 1.445 | 1.345 | 1.473 | 1.473 | 2.0   | 173.4 | 4.9   | 0.120 |
| EZE                             | 1.278 | 1.401 | 1.349 | 1.457 | 1.340 | 1.468 | 1.483 | 171.9 | 38.2  | 176.5 | 0.130 |
| ZZE                             | 1.282 | 1.387 | 1.356 | 1.449 | 1.347 | 1.466 | 1.470 | 0.0   | 0.4   | 180.0 | 0.115 |
| ZZZ                             | 1.280 | 1.386 | 1.350 | 1.456 | 1.344 | 1.469 | 1.476 | 1.8   | 42.2  | 5.6   | 0.122 |
| EZZ                             | 1.278 | 1.400 | 1.346 | 1.463 | 1.341 | 1.473 | 1.478 | 175.2 | 44.8  | 0.8   | 0.132 |

*Energies of the HOMO and LUMO orbitals*

**Table S5:** Energies (in eV) of HOMO, LUMO and HOMO/LUMO gap of the isomers of AQM1, AQM2 and AQM3 compounds calculated at the PBE0/6-311G(d,p), B3LYP/6-311G(d,p) and  $\omega$ B97XD/6-311G(d,p) levels.

|                | HOMO   | LUMO   | HOMO/LUMO gap |
|----------------|--------|--------|---------------|
| <b>AQM1</b>    |        |        |               |
| PBE0           |        |        |               |
| Z              | -5.646 | -2.382 | 3.263         |
| E              | -5.738 | -2.261 | 3.477         |
| B3LYP          |        |        |               |
| Z              | -5.435 | -2.474 | 2.961         |
| E              | -5.516 | -2.474 | 3.04          |
| $\omega$ B97XD |        |        |               |
| Z              | -7.230 | -0.827 | 6.403         |
| E              | -7.541 | -0.443 | 7.098         |
| <b>AQM2</b>    |        |        |               |
| PBE0           |        |        |               |
| ZE             | -5.319 | -2.344 | 2.975         |



|                |        |        |       |
|----------------|--------|--------|-------|
| EE             | -5.239 | -2.344 | 2.895 |
| ZZ             | -5.277 | -2.283 | 2.994 |
| EZ             | -5.278 | -2.260 | 3.018 |
| B3LYP          |        |        |       |
| ZE             | -5.141 | -2.460 | 2.681 |
| EE             | -5.066 | -2.462 | 2.603 |
| ZZ             | -5.099 | -2.400 | 2.698 |
| EZ             | -5.099 | -2.384 | 2.715 |
| $\omega$ B97XD |        |        |       |
| ZE             | -6.940 | -0.823 | 6.116 |
| EE             | -6.855 | -0.819 | 6.036 |
| ZZ             | -6.879 | -0.763 | 6.116 |
| EZ             | -7.085 | -0.608 | 6.477 |
| <hr/>          |        |        |       |
| AQM3           |        |        |       |
| PBE0           |        |        |       |
| EEE            | -5.241 | -2.632 | 2.609 |
| EEZ            | -5.370 | -2.575 | 2.795 |
| ZEE            | -5.305 | -2.574 | 2.734 |
| ZEZ            | -5.592 | -2.540 | 3.051 |
| EZE            | -5.358 | -2.609 | 2.748 |
| ZZE            | -5.321 | -2.679 | 2.642 |
| ZZZ            | -5.592 | -2.437 | 3.155 |
| EZZ            | -5.585 | -2.381 | 3.203 |
| B3LYP          |        |        |       |
| EEE            | -5.053 | -2.714 | 2.340 |
| EEZ            | -5.177 | -2.680 | 2.497 |
| ZEE            | -5.114 | -2.658 | 2.456 |
| ZEZ            | -5.239 | -2.647 | 2.592 |
| EZE            | -5.150 | -2.713 | 2.437 |
| ZZE            | -5.128 | -2.760 | 2.367 |
| ZZZ            | -5.391 | -2.519 | 7.910 |
| EZZ            | -5.390 | -2.494 | 2.896 |
| $\omega$ B97XD |        |        |       |
| EEE            | -6.783 | -1.095 | 5.691 |
| EEZ            | -6.969 | -0.959 | 6.010 |
| ZEE            | -6.871 | -1.020 | 5.851 |
| ZEZ            | -7.046 | -0.906 | 6.140 |
| EZE            | -7.273 | -0.705 | 6.568 |
| ZZE            | -6.903 | -1.133 | 5.770 |
| ZZZ            | -7.265 | -0.781 | 6.484 |
| EZZ            | -7.376 | -0.617 | 6.759 |

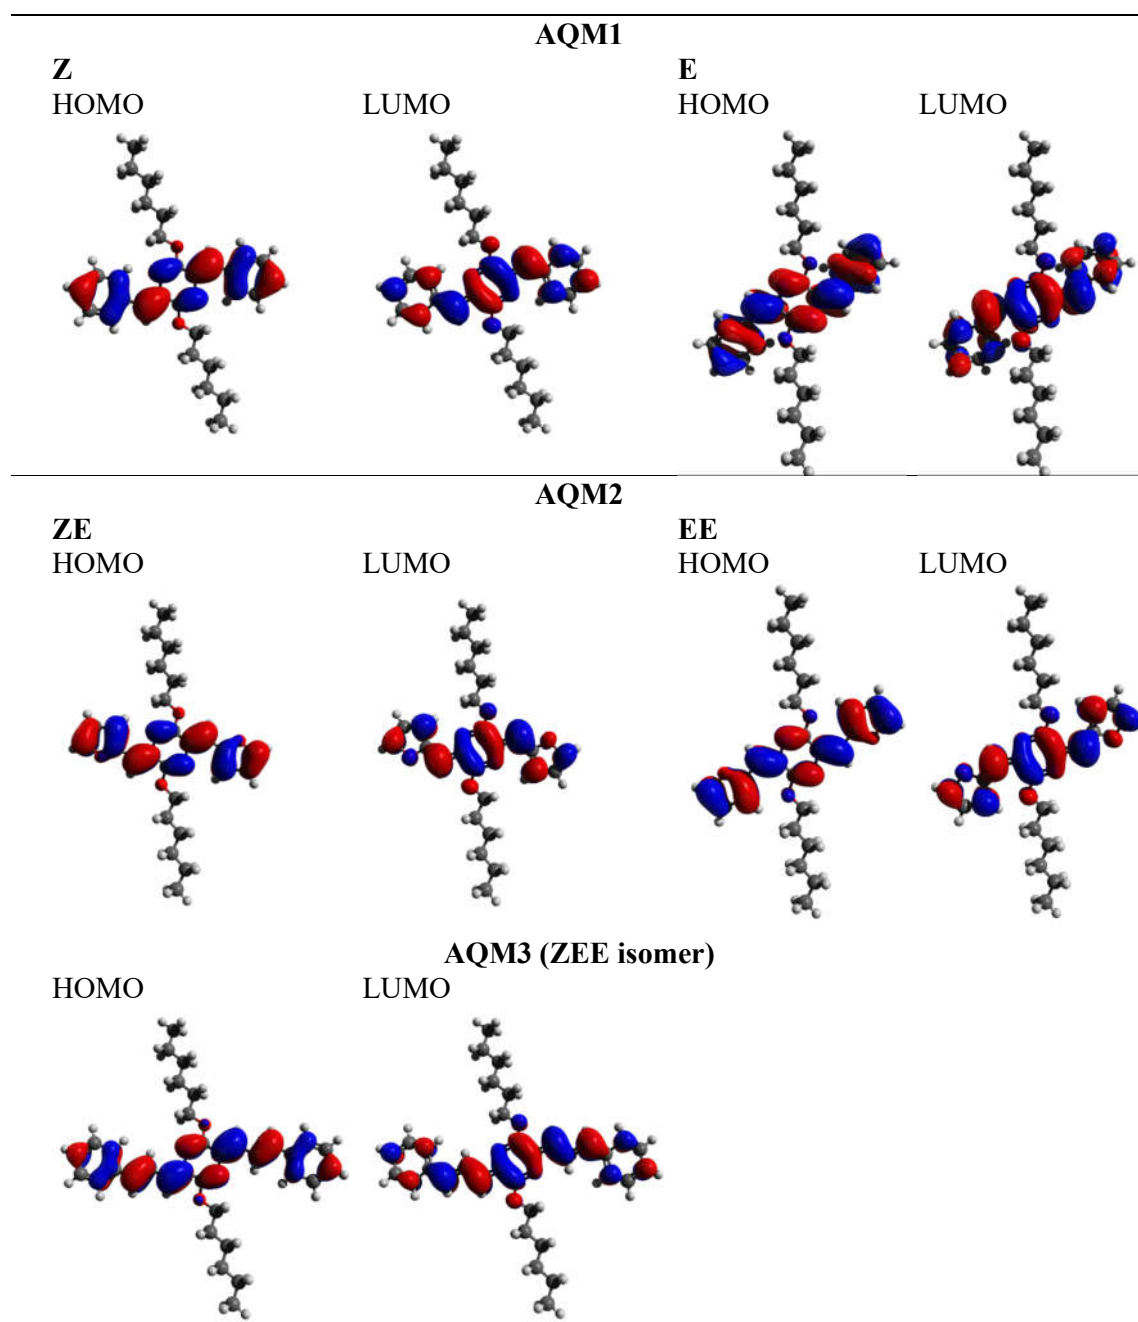

**Figure S10.** HOMO and LUMO orbitals for AQM1, AQM2 and AQM3 obtained at the PBE0/6-311G(d,p) level of calculations

To get a first qualitative idea of the TDDFT performance with respect to this family of compounds, we start by computing their TDDFT vertical absorption spectra in chloroform solvent from their ground-state optimized structures (**Figure S11**) either with PBE0, B3LYP or  $\omega$ B97XD functionals. The results are compiled in **Table S6**. The Z, ZE and ZEE isomers of **AQM1**, **AQM2** and **AQM3** were used for this study.

It is clear that CAM-B3LYP, M062X and  $\omega$ B97XD functionals provide almost similar results and the better agreement with experimental data for the lowest maximum absorption. The PBE0, B3LYP and M06 are dismissed due to the large red-shift in the absorption energies. Following this study, we selected

the  $\omega$ B97XD functional to calculate the excited state energies in combination with the geometries calculated with PBE0. The calculated  $S_0 \rightarrow S_1$  energies using the combination are found to be 465 nm for AQM3 (463 nm exptl), 408 nm for AQM1 (400 nm exptl) and 434 nm for AQM2 (446 nm exptl)

**Table S6:** Benchmark on transitions for **AQM3** (ZEE isomer), **AQM1** (Z isomer) and **AQM2** (ZE isomer) compounds. The ground state geometries were computed using the 6-311G(d,p) basis-set using PBE0, B3LYP and  $\omega$ B97XD functionals.

|                | AQM3                        |       | AQM1                  |       | AQM2                  |       |
|----------------|-----------------------------|-------|-----------------------|-------|-----------------------|-------|
|                | PBE0/6-311G(d,p)            |       |                       |       |                       |       |
|                | $S_0 \rightarrow S_1$       | $f$   | $S_0 \rightarrow S_1$ | $f$   | $S_0 \rightarrow S_1$ | $f$   |
| PBE0           | 510                         | 2.494 | 427                   | 1.681 | 460                   | 1.513 |
| B3LYP          | 523                         | 2.443 | 437                   | 1.645 | 469                   | 1.481 |
| CAM-B3LYP      | 470                         | 2.583 | 402                   | 1.751 | 435                   | 1.561 |
| M06            | 518                         | 2.448 | 435                   | 1.644 | 467                   | 1.483 |
| M062X          | 468                         | 2.561 | 399                   | 1.746 | 433                   | 1.554 |
| $\omega$ B97XD | 465                         | 2.588 | 400                   | 1.751 | 434                   | 1.564 |
| Exptl          | 463                         |       | 408                   |       | 446                   |       |
|                | B3LYP/6-311G(d,p)           |       |                       |       |                       |       |
|                | $S_0 \rightarrow S_1$       | $f$   | $S_0 \rightarrow S_1$ | $f$   | $S_0 \rightarrow S_1$ | $f$   |
| PBE0           | 512                         | 2.502 | 429                   | 1.687 | 463                   | 1.527 |
| B3LYP          | 526                         | 2.451 | 439                   | 1.651 | 472                   | 1.495 |
| CAM-B3LYP      | 472                         | 2.592 | 403                   | 1.759 | 437                   | 1.575 |
| M06            | 521                         | 2.455 | 437                   | 1.651 | 470                   | 1.496 |
| M062X          | 470                         | 2.570 | 400                   | 1.754 | 435                   | 1.568 |
| $\omega$ B97XD | 468                         | 2.597 | 401                   | 1.759 | 436                   | 1.589 |
| Exptl          | 463                         |       | 408                   |       | 446                   |       |
|                | $\omega$ B97XD /6-311G(d,p) |       |                       |       |                       |       |
|                | $S_0 \rightarrow S_1$       | $f$   | $S_0 \rightarrow S_1$ | $f$   | $S_0 \rightarrow S_1$ | $f$   |
| PBE0           | 480                         | 2.433 | 412                   | 1.653 | 443                   | 1.469 |
| B3LYP          | 493                         | 2.376 | 422                   | 1.615 | 452                   | 1.436 |
| CAM-B3LYP      | 438                         | 2.555 | 386                   | 1.734 | 415                   | 1.527 |
| M06            | 487                         | 2.394 | 420                   | 1.619 | 449                   | 1.442 |
| M062X          | 437                         | 2.528 | 383                   | 1.728 | 414                   | 1.518 |
| $\omega$ B97XD | 434                         | 2.564 | 394                   | 1.736 | 414                   | 1.532 |
| Exptl          | 463                         |       | 408                   |       | 446                   |       |

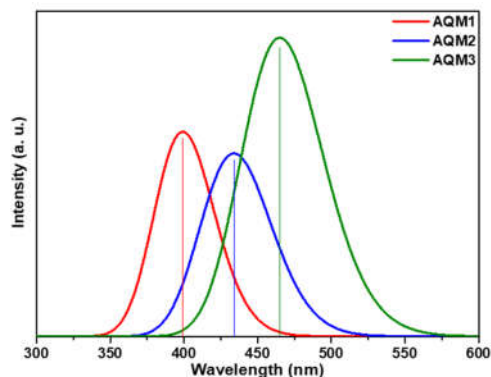

**Figure S11:** TD-DFT calculations of the absorption spectra of **AQM1** (Z), **AQM2** (ZE) and **AQM3** (ZEE)

**Table S7:** Lowest electronic transition energies calculated for AQM3, AQM1 and AQM2 compounds at the  $\omega$ B97XD/6-311G(d,p) PBE1PBE/6-311G(d,p).

| <b>AQM3</b> |                       |        |
|-------------|-----------------------|--------|
|             | $S_0 \rightarrow S_1$ | $f$    |
| EEE         | 482                   | 2.569  |
| EEZ         | 456                   | 2.718  |
| ZEE         | 465                   | 2.588  |
| EZE         | 475                   | 2.610  |
| ZEZ         | 443                   | 2.798  |
| ZZZ         | 427                   | 2.903  |
| EZZ         | 428                   | 2.898  |
| ZZE         | 492                   | 2.521  |
| Exptl       | 463                   |        |
| <b>AQM1</b> |                       |        |
| Z           | 400                   | 1.7512 |
| E           | 383                   | 1.555  |
| Exptl       | 408                   |        |
| <b>AQM2</b> |                       |        |
| ZE          | 434                   | 1.564  |
| EE          | 442                   | 1.797  |
| ZZ          | 427                   | 1.711  |
| EZ          | 431                   | 1.534  |
| Exptl       | 446                   |        |

**Table S8:** Lowest electronic transition energies in absorption and emission calculated for **AQM3** (ZEE isomer), **AQM1** (Z isomer) and **AQM2** (ZE isomer) compounds at the  $\omega$ B97XD/6-311G(d,p) PBE1PBE/6-311G(d,p) level.

|             | <b>Absorption</b>     |       | <b>Emission</b>       |       |
|-------------|-----------------------|-------|-----------------------|-------|
|             | $S_0 \rightarrow S_1$ | $f$   | $S_1 \rightarrow S_0$ | $f$   |
| <b>AQM1</b> | 400                   | 1.751 | 481                   | 2.250 |
| <b>AQM2</b> | 434                   | 1.564 | 512                   | 2.420 |
| <b>AQM3</b> | 465                   | 2.588 | 626                   | 1.981 |

### Redox potentials

DFT calculations were also performed to determine the redox potentials in chloroform according to the thermodynamic cycle shown below:

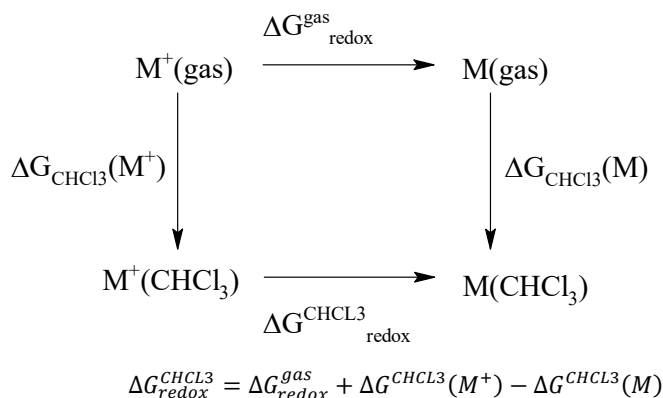

Where

$$\Delta G_{\text{redox}}^{\text{CHCl}_3} = \Delta G_{\text{redox}}^{\text{gas}} + \Delta \Delta G_{\text{sol}}$$

And

$$\Delta G_{\text{redox}}^{\text{gas}} = G^{\text{gas}}(M) - G^{\text{gas}}(M^+)$$

$$\Delta \Delta G_{\text{sol}} = \Delta G^{\text{CHCl}_3}(M^+) - \Delta G^{\text{CHCl}_3}(M)$$

And the redox potential is related to  $\Delta G_{\text{redox}}^{\text{CHCl}_3}$  as  $\Delta G_{\text{redox}}^{\text{CHCl}_3} = -FE_{\text{redox}}^\circ$

Where  $F$  is the Faraday constant,  $23.06 \text{ kcal.mol}^{-1} \text{ V}^{-1}$ . The standard hydrogen electrode potential,  $V_{\text{SHE}}$  was taken as  $4.43 \text{ eV}$  [1].

From the lowest isomers of **AQM1**, **AQM2** and **AQM3**, i.e. Z, ZE and ZEE isomers respectively, the redox potentials were calculated in chloroform according to the thermodynamic cycle shown above. Results are gathered in **Table S9** and compared with the experimental ones.

**Table S9.** Computed redox potentials vs. experimental ones of the **AQM1**, **AQM2** and **AQM3** compounds. For each compound, calculation were performed on the most stable isomer at the PBE0/6-311(g,d) level.

|                   | <b>AQM1</b> | <b>AQM2</b> | <b>AQM3</b> |
|-------------------|-------------|-------------|-------------|
| Calc E (V vs SCE) | 1.00        | 0.72        | 0.67        |
| Exp E (V vs SCE)  | 0.72        | 0.64        | 0.72        |

The calculated results obtained for **AQM2** and **AQM3** are in relatively good agreement with the experimental ones measured by cyclic voltammetry with an error less than  $0.08 \text{ V}$ . Concerning **AQM1** the agreement is less satisfactory and the calculated error is  $0.28 \text{ V}$ .

Chemical structure of 2,2'-biphenyl-5,5'-dicarbonylhydrazide is shown above the spectrum.

<sup>1</sup>H NMR spectrum (DMSO-d<sub>6</sub>) showing peaks and integration values:

- Peak at 1.92 ppm (integration 1.92)
- Peak at 2.00 ppm (integration 2.00)
- Peak at 2.24 ppm (integration 2.24)
- Peak at 4.39 ppm (integration 4.39)
- Peak at 4.65 ppm (integration 4.65)
- Peak at 6.78 ppm (integration 6.78)
- Peak at 3.35 ppm (integration 3.35)

Chemical shift range: 1.92 to 7.57 ppm.

Chemical structure: O=C1C(=O)c2ccccc2C(=O)c3ccccc13

<sup>13</sup>C NMR peaks (ppm):

- 158.02
- 133.12
- 129.32
- 128.68
- 128.16
- 126.45
- 114.95

Inset peaks (ppm):

- 129.32
- 128.68
- 128.16
- 126.45

14

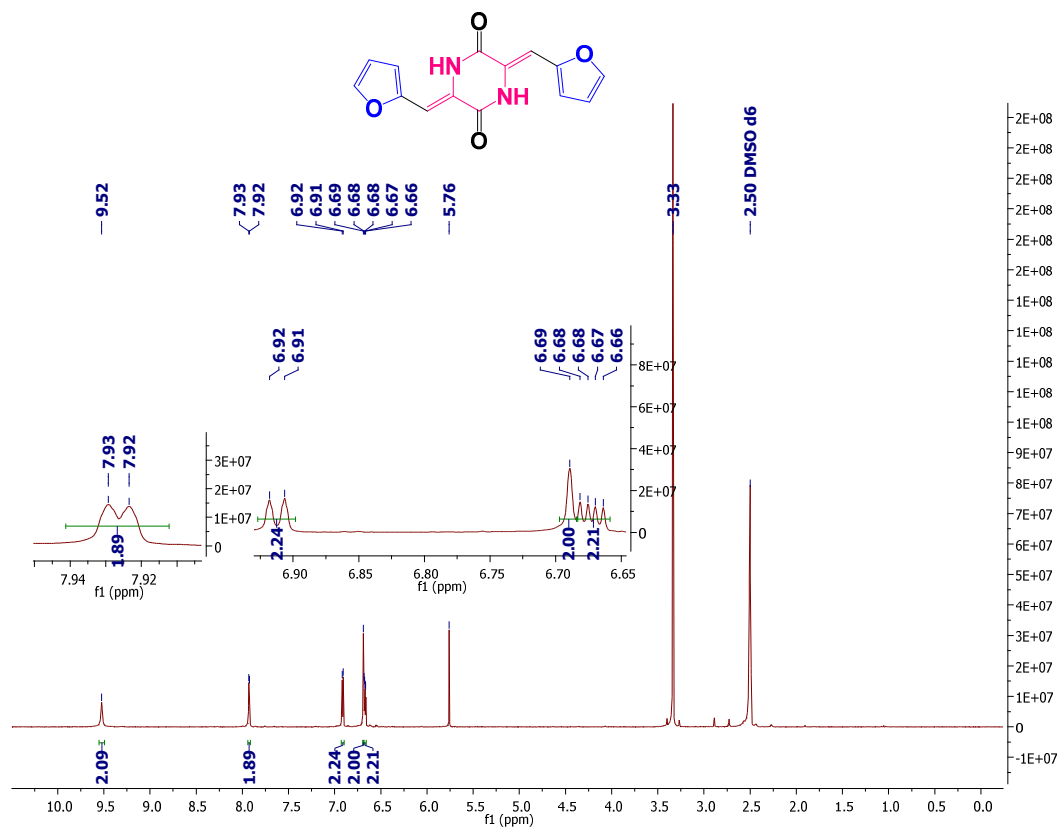

Figure S14: <sup>1</sup>H NMR spectrum of **2b** (DMSO d<sub>6</sub>, 300 MHz)

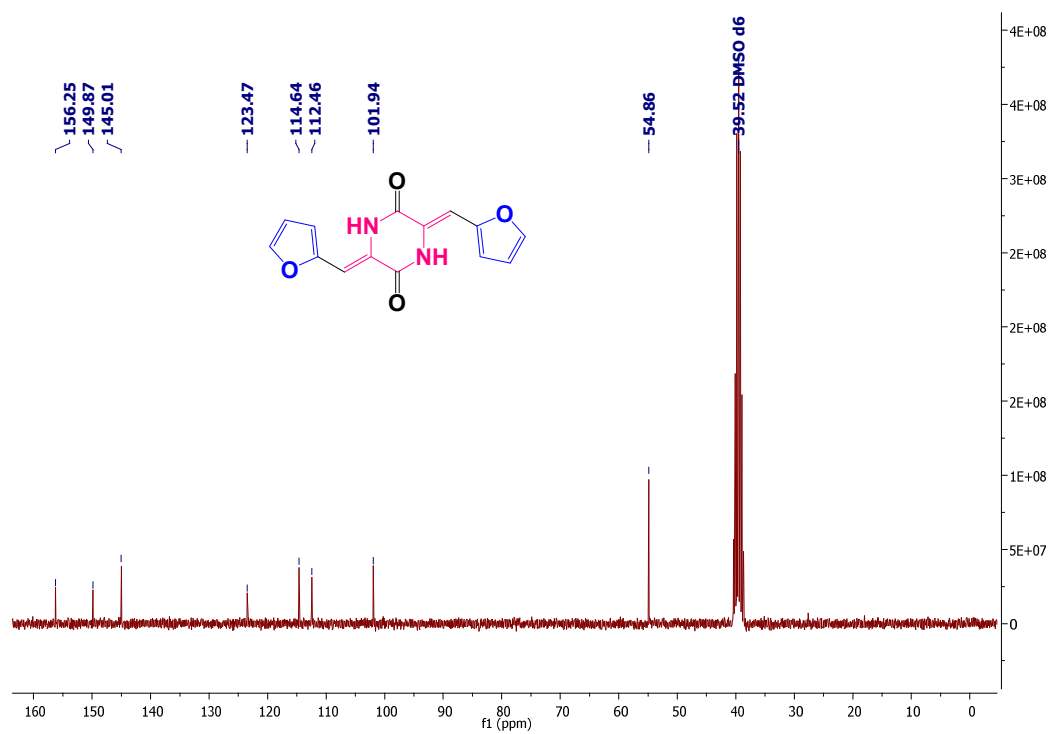

Figure S15: <sup>13</sup>C NMR spectrum of **2b** (DMSO d<sub>6</sub>, 75 MHz)

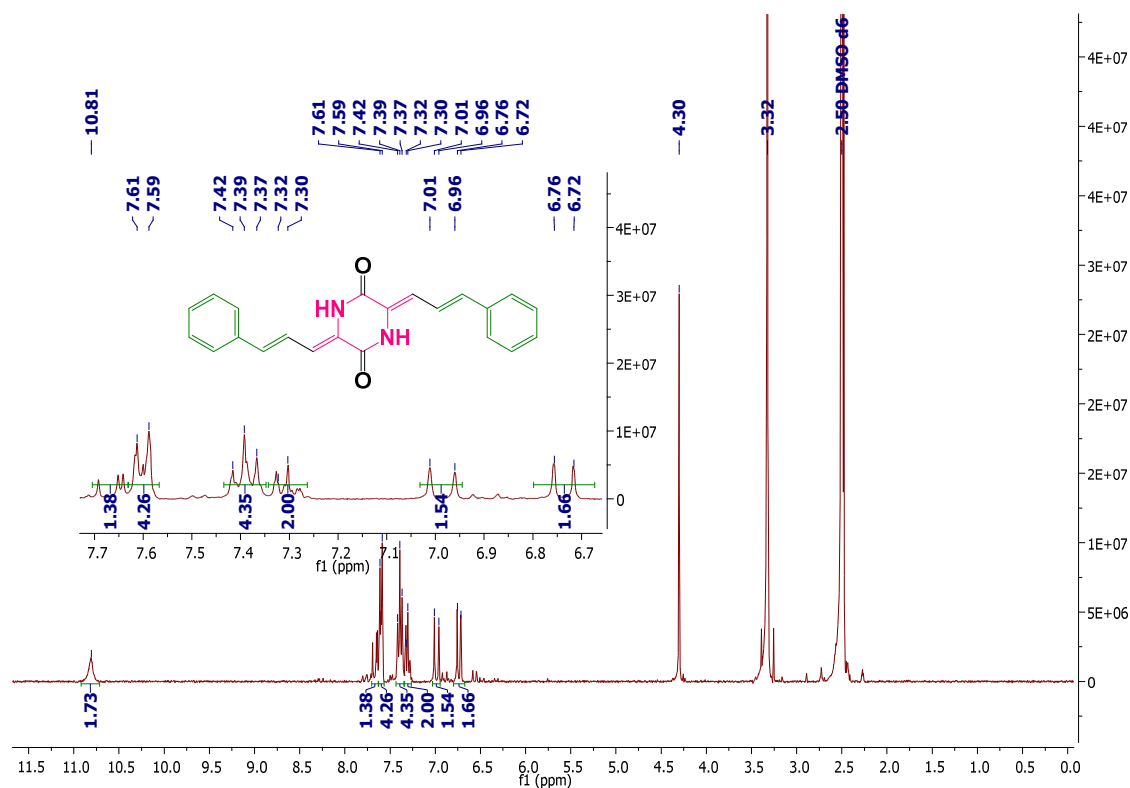

Figure S16: <sup>1</sup>H NMR spectrum of 2c (DMSO d<sub>6</sub>, 300 MHz)

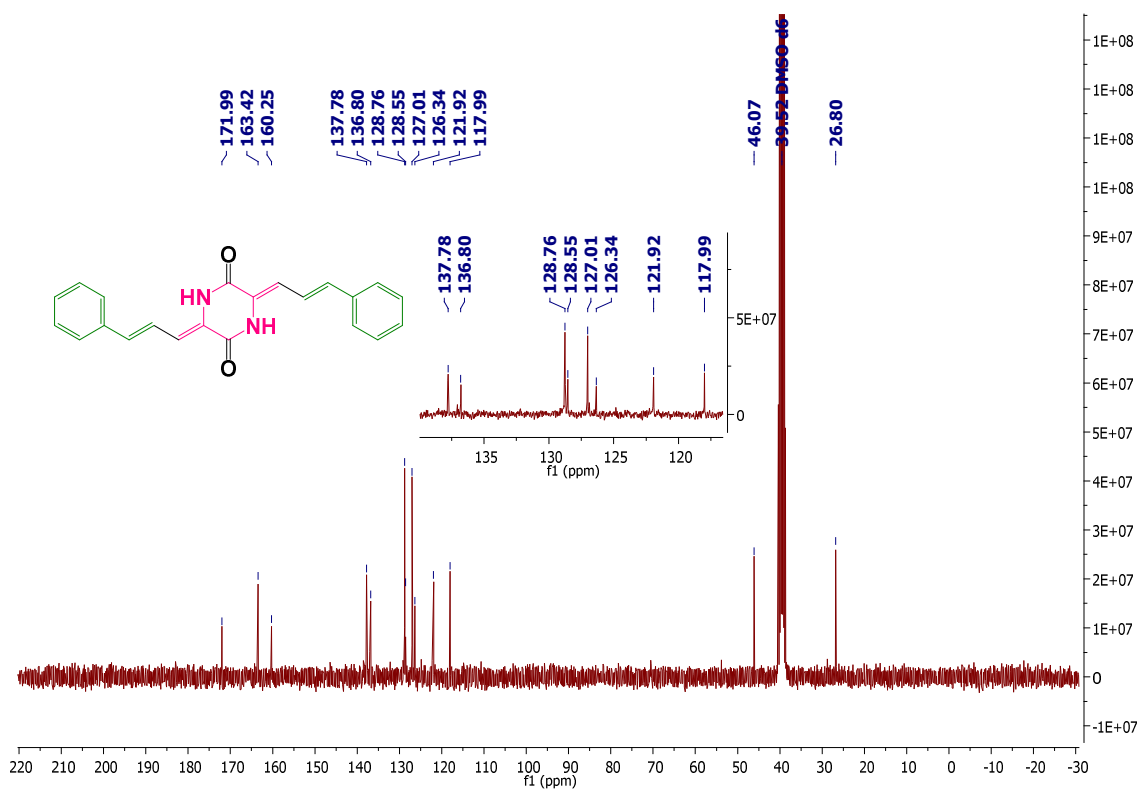

Figure S17: <sup>13</sup>C NMR spectrum of 2c (DMSO d<sub>6</sub>, 75 MHz)



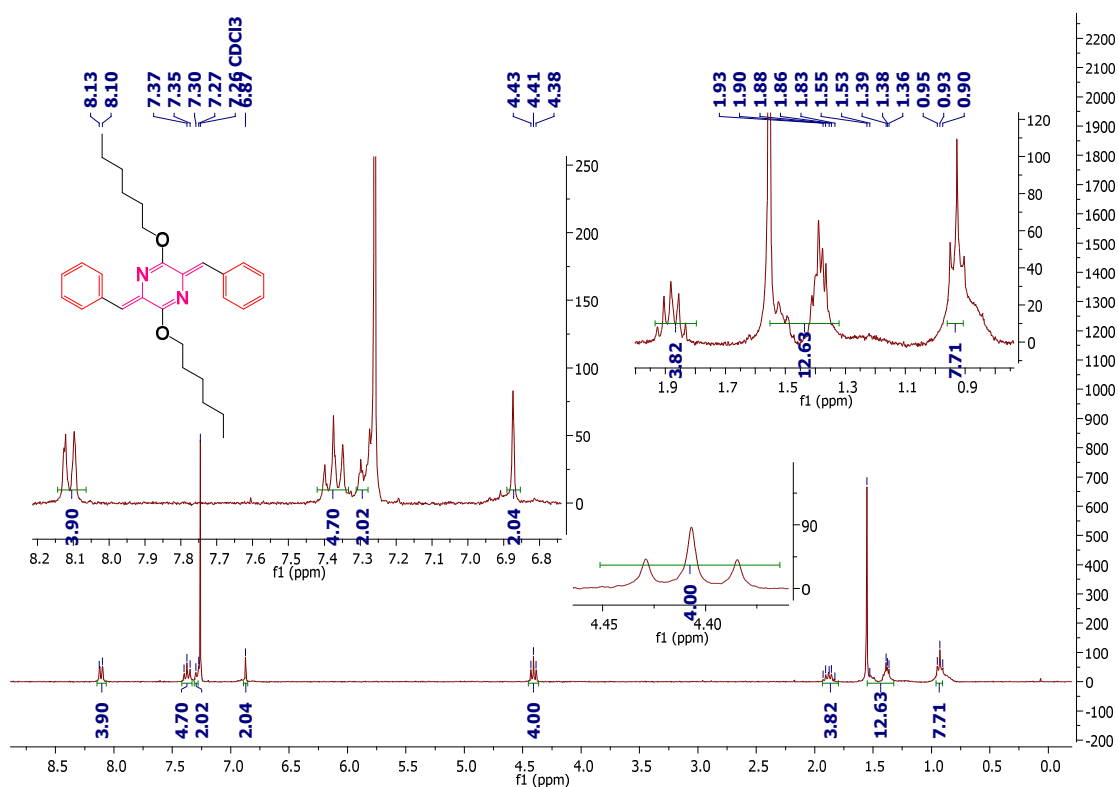

Figure S18: <sup>1</sup>H NMR spectrum of AQM1 (CDCl<sub>3</sub>, 300 MHz)

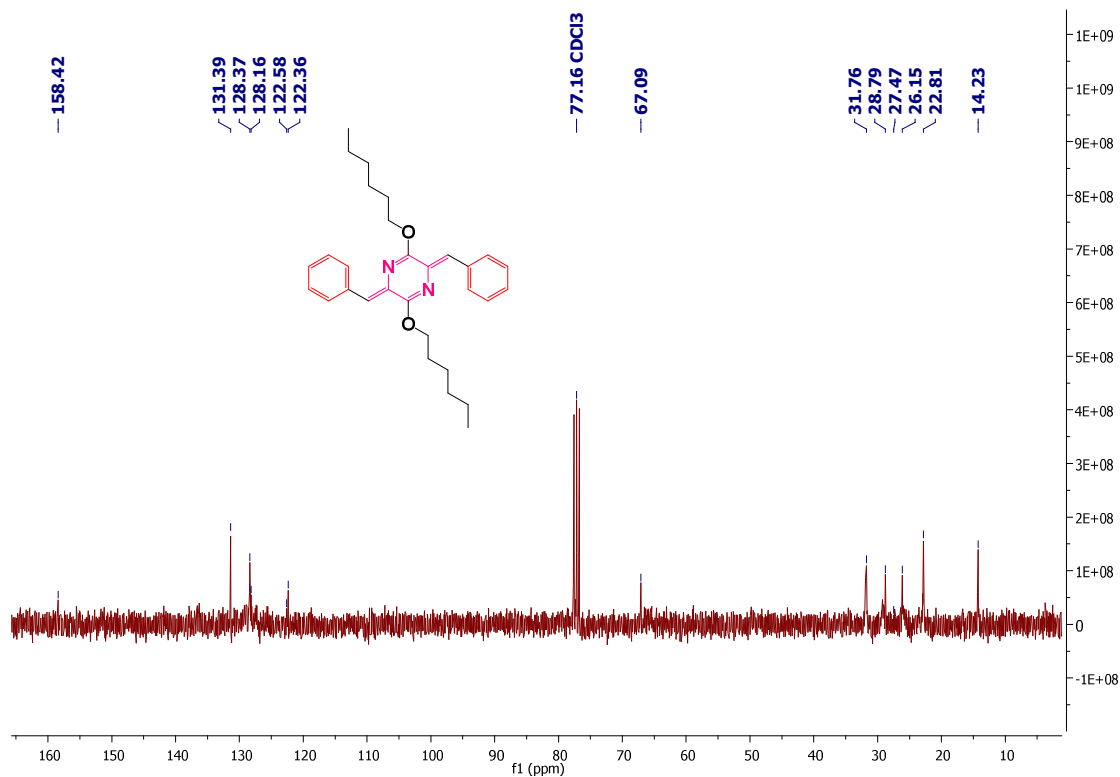

Figure S19: <sup>13</sup>C NMR spectrum of AQM1 (CDCl<sub>3</sub>, 75 MHz)

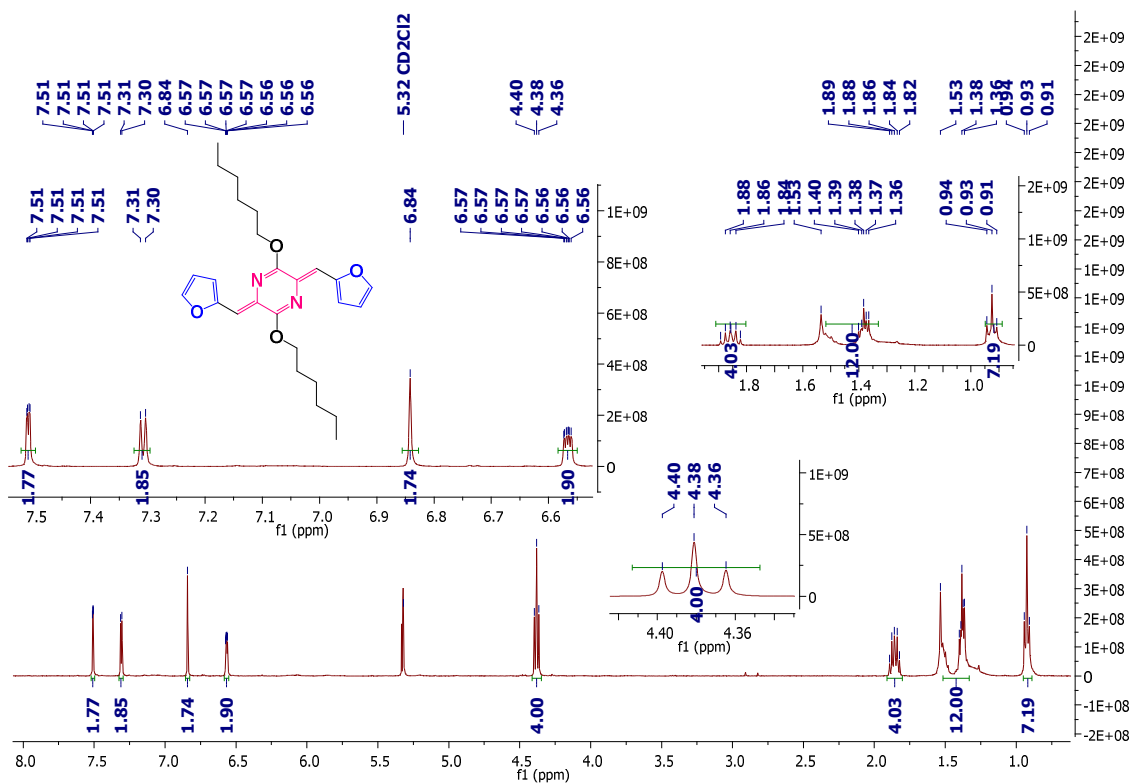

**Figure S20:** <sup>1</sup>H NMR spectrum of AQM2 (CD<sub>2</sub>Cl<sub>2</sub>, 400 MHz)

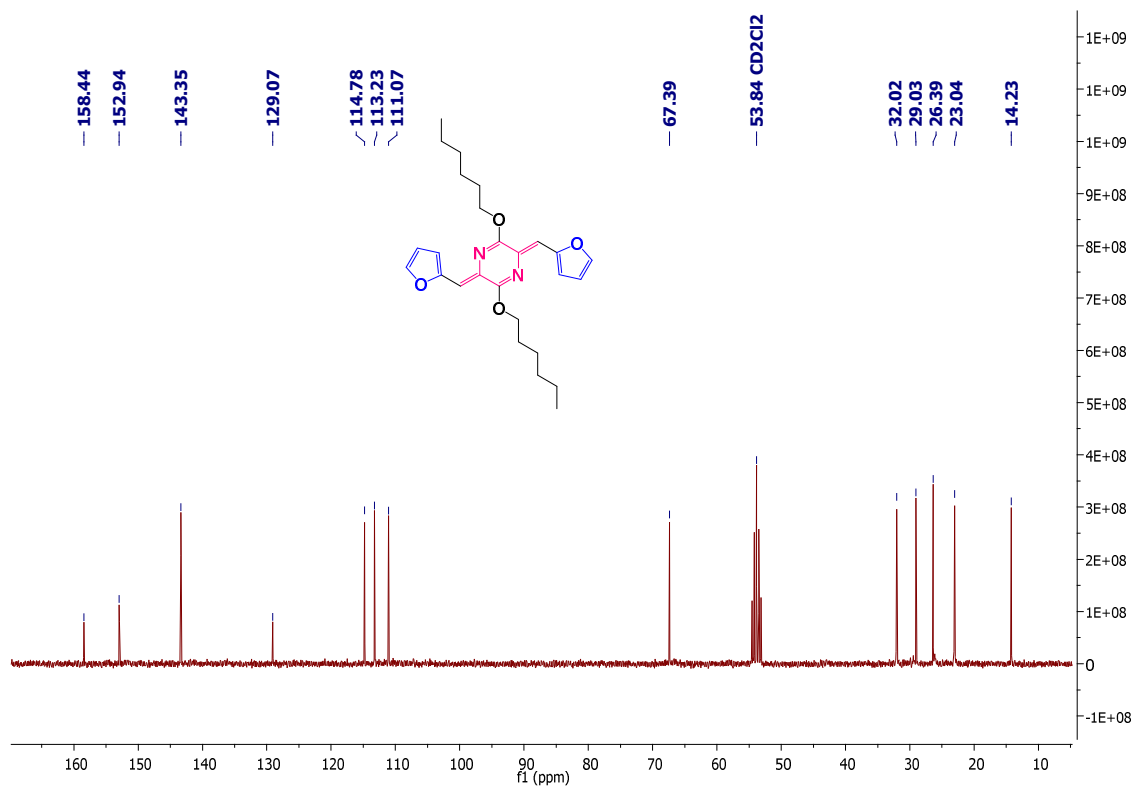

**Figure S21:** <sup>13</sup>C NMR spectrum of AQM2 (CD<sub>2</sub>Cl<sub>2</sub>, 75 MHz)

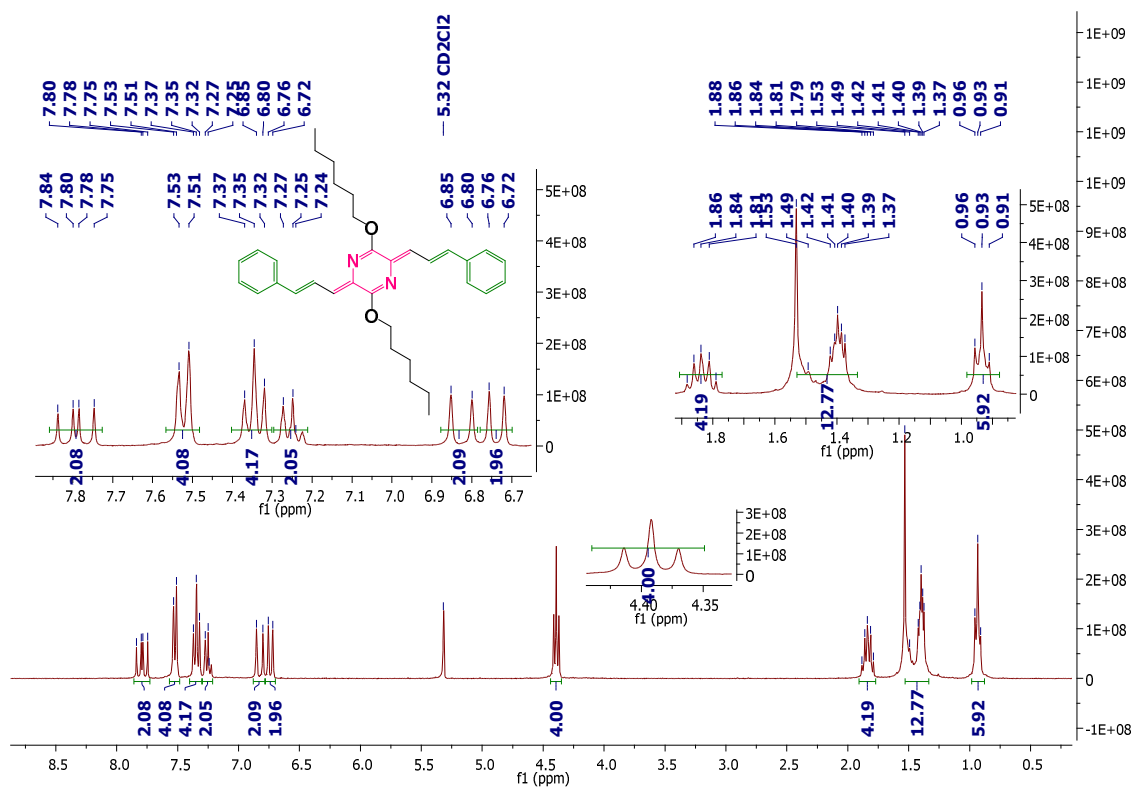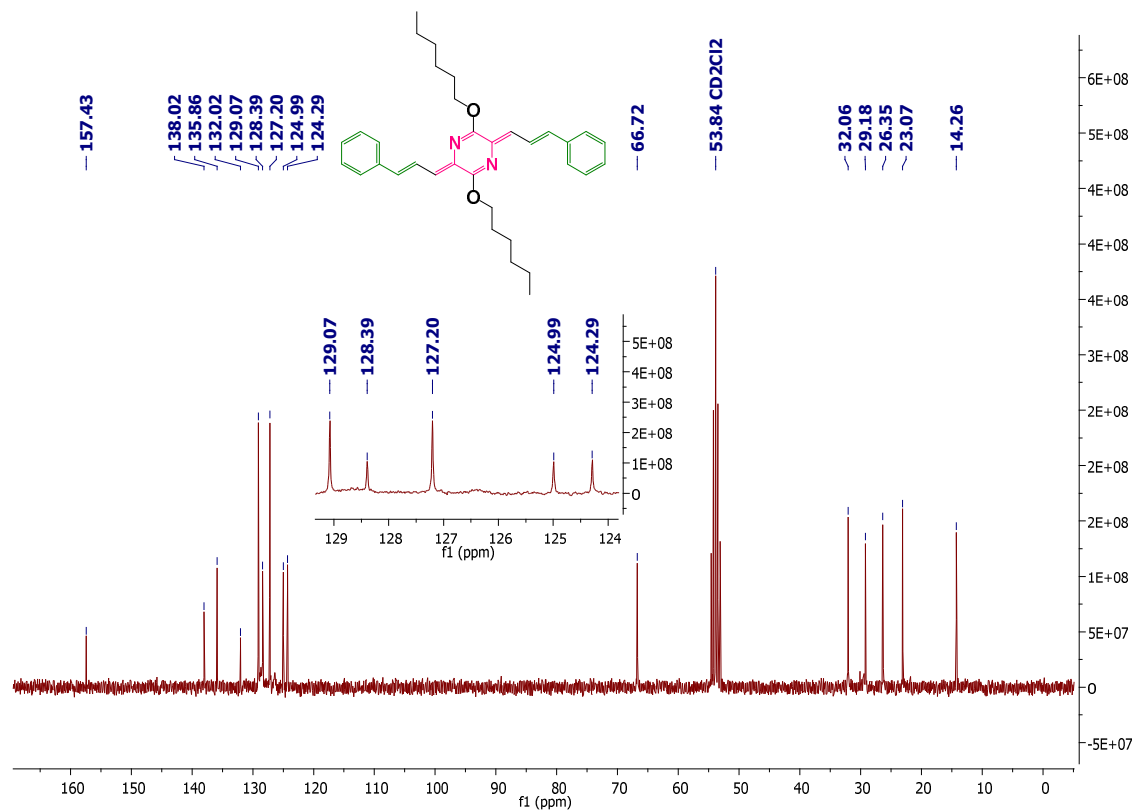

## References

- (1) Reiss, H.; Heller, A. The Absolute Potential of the Standard Hydrogen Electrode: A New Estimate. *J. Phys. Chem.* **1985**, *89* (20), 4207–4213. <https://doi.org/10.1021/j100266a013>.
